# Supplementary material
Source: PubMed Central journal article supplement (PMC5601352)
Supplement: AEM.01323-17_zam999118084s1.pdf [file AEM.01323-17_zam999118084s1.pdf]

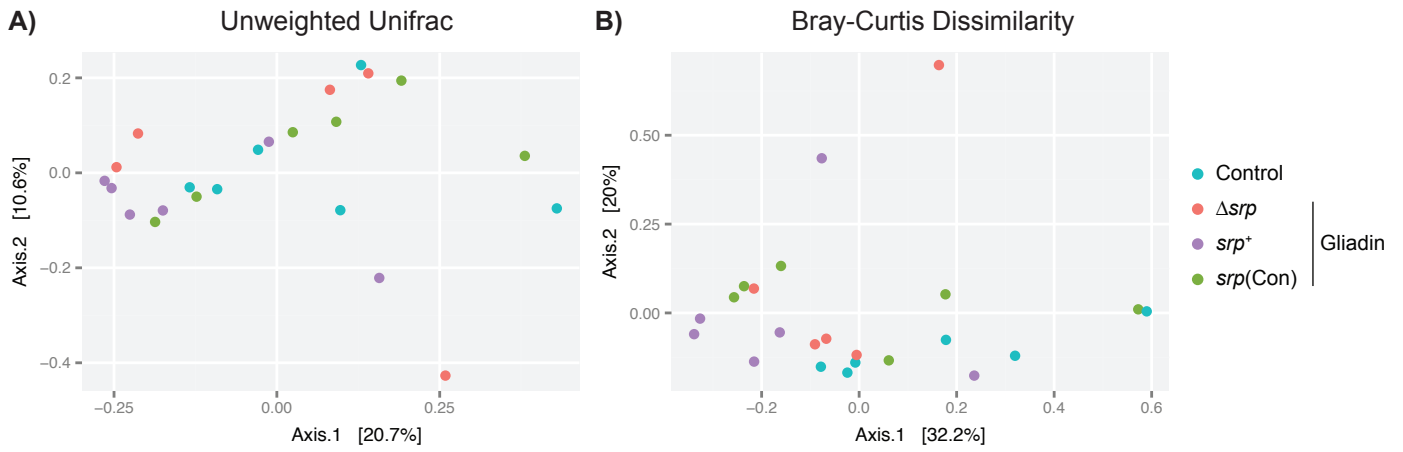

**Supplementary figure 1. Small intestinal microbiota profiles.** Principal coordinate analysis plots representing  $\beta$ -diversity using both **A)** Bray-Curtis Dissimilarity and **B)** Unifrac Unweighted parameters revealed no significant differences in small intestinal microbiota (n=5-6/group). Non-sensitized, no treatment (Control); *B. longum*  $srp^+$  ( $srp^+$ ); *B. longum*  $\Delta srp$  ( $\Delta srp$ ); *B. longum*  $srp(Con)$  ( $srp(Con)$ ). Statistics were performed via PERMANOVA in QIIME. Plots were constructed in R.

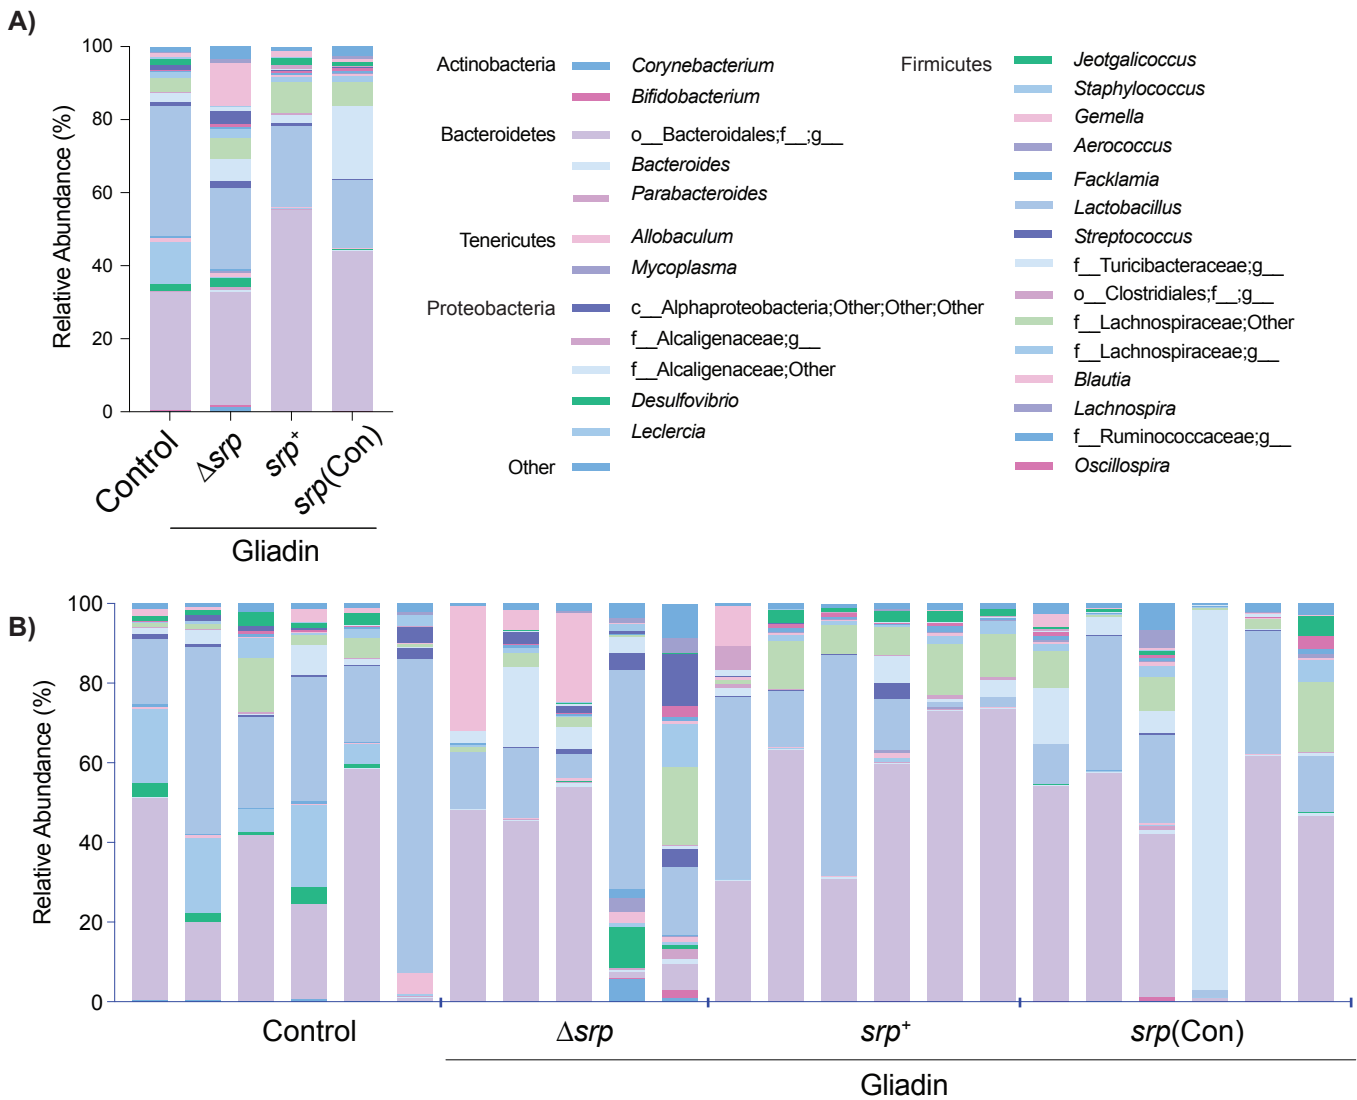

**Supplementary figure 2. Relative abundances in small intestinal microbiota profiles at genus level.**

Small intestinal microbiota was sequenced via 16s miSeq Illumina technology. Operational taxonomic units at relative abundances  $\geq 1\%$  are presented as **A)** average of each group and **B)** per mouse ( $n=5-6/\text{group}$ ). No changes in relative abundances were found. Non-sensitized, no treatment (Control); *B. longum*  $\text{srp}^+$  ( $\text{srp}^+$ ); *B. longum*  $\Delta\text{srp}$  ( $\Delta\text{srp}$ ); *B. longum*  $\text{srp}(\text{Con})$  ( $\text{srp}(\text{Con})$ ). Statistics were performed via Kruskal-Wallis followed by FDR ( $q < 0.05$ ).

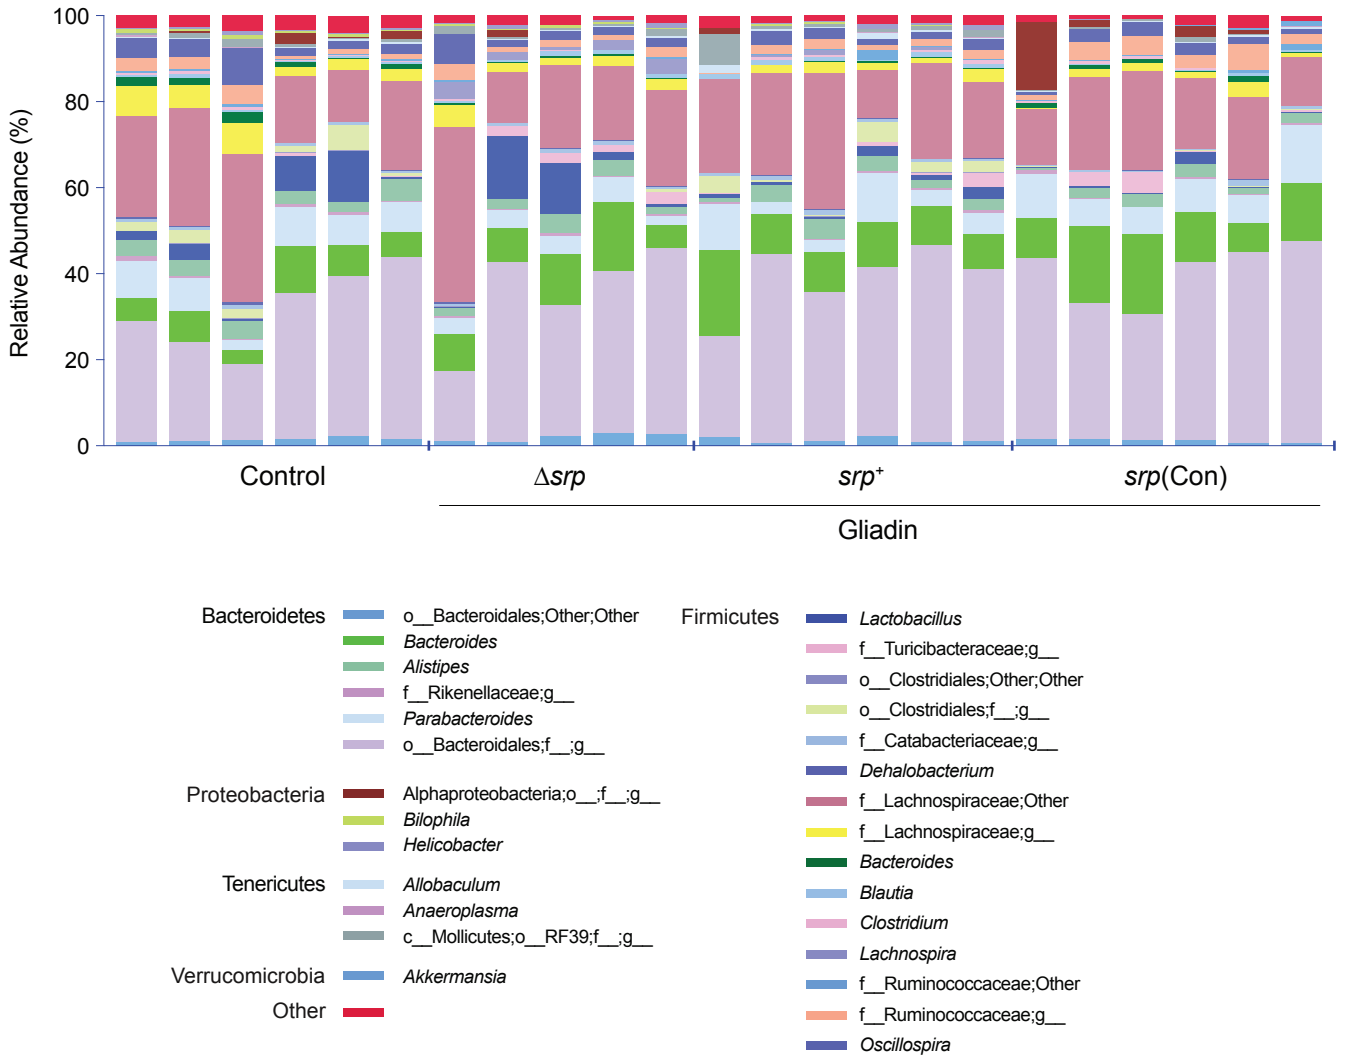

**Supplementary figure 3. Relative abundances of fecal microbiota for individual mice at genus level.**

Fecal microbiota was sequenced via 16s miSeq illumina technology by amplification of the 16S rRNA gene, and relative abundances are represented at a genus level in stacked column charts (n=5-6/group).

Non-sensitized, no treatment (Control); *B. longum*  $srp^+$  ( $srp^+$ ); *B. longum*  $\Delta srp$  ( $\Delta srp$ ); *B. longum*  $srp(Con)$  ( $srp(Con)$ ). Statistics were performed via Kruskal-Wallis followed by FDR ( $q < 0.05$ ).
